# Supplementary material for: Different Expression and Clinical Implications of Cancer-Associated Fibroblast (CAF) Markers in Brain Metastases
Source: PubMed Central journal article supplement (PMC9969586; doi:10.7150/jca.80115), 2023-02-05
Supplement: jcav14p0464s1.pdf [file jcav14p0464s1.pdf]

## Supplementary Materials:

Fig. S1. Weakly expressed CAF-related markers in BM-CAFs. (A) Twist1 was expressed in the nuclei of stromal CAFs of BM at variable levels according to primary cancer type. (B) NG2 and Tenascin-C were weakly expressed in a small number of cases, while PDGFR- $\alpha$  was expressed only in parenchymal tumor cells.

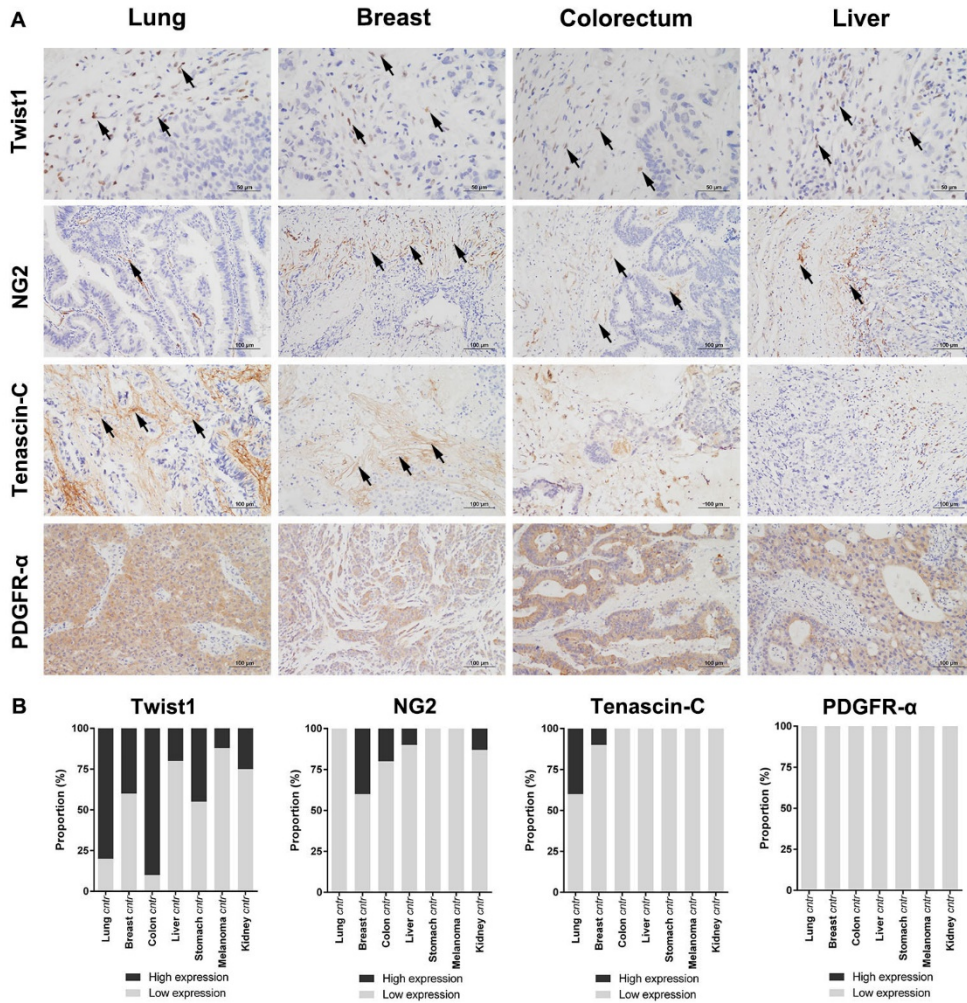

Supplementary Table 1. Case numbers of primary organ cancers at each selection step and the composition of histologic diagnoses

| Primary organs | No. of cases  |               |                 | Primary diagnosis             |
|----------------|---------------|---------------|-----------------|-------------------------------|
|                | 1st selection | 2nd selection | Final selection |                               |
| Lung           | 228           | 192           | 10              | 6 ADC, 2SQC, 2 ASQC           |
| Breast         | 50            | 47            | 10              | 9 IDC, 1 ILC                  |
| Colorectum     | 32            | 28            | 10              | 10 ADC                        |
| Liver          | 25            | 17            | 10              | 8 HCC, 2 CCA                  |
| Stomach        | 15            | 11            | 11              | 7 Intestinal, 3 Diffuse, 1NEC |
| Melanoma       | 11            | 9             | 9               | 5 Skin, 3 Unknown             |
| Kidney         | 10            | 8             | 8               | 5 CRCC, 2 ChRCC, 1 NEC        |
| Thyroid        | 11            | 3             | 0               |                               |
| <b>Total</b>   | <b>382</b>    | <b>315</b>    | <b>68</b>       |                               |

ADC, adenocarcinoma; SQC, squamous cell carcinoma; ASQC, adenosquamous carcinoma; IDC, invasive ductal carcinoma; ILC, invasive lobular carcinoma; HCC, hepatocellular carcinoma; CCA, cholangiocarcinoma; Intestinal, intestinal-type gastric adenocarcinoma; Diffuse, diffuse-type gastric adenocarcinoma; NEC, neuroendocrine carcinoma; Skin, melanoma of skin primary; Unknown, melanoma of unknown primary; CRCC, Clear cell renal cell carcinoma; ChRCC, Chromophobe renal cell carcinoma.
